# Supplementary material for: Phylogenomic evidence for a common ancestor of mitochondria and the SAR11 clade
Source: PubMed Central journal article supplement — Sci Rep. 2011 Jun 14;1:13. doi: 10.1038/srep00013 (PMC3216501; doi:10.1038/srep00013), 2011-06-14
Supplement: srep00013-s1.pdf [file srep00013-s1.pdf]

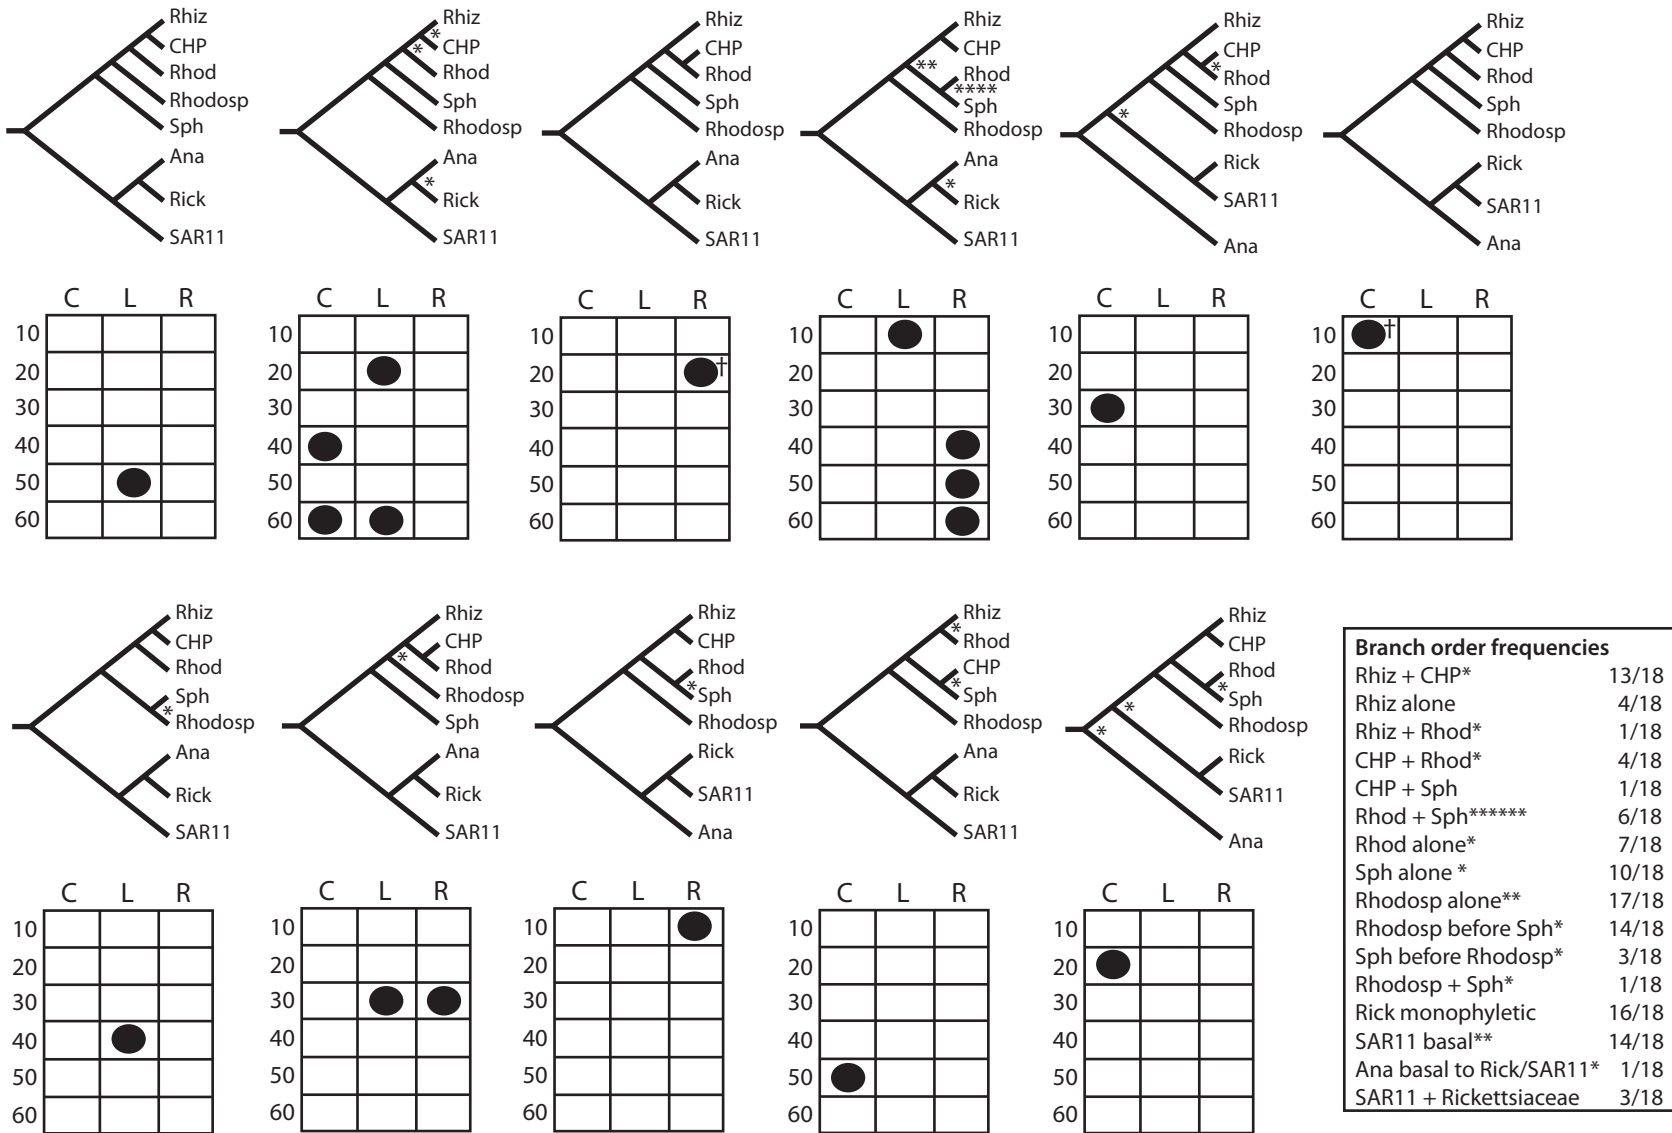

Figure S1. Alphaproteobacterial branch order frequencies. Each observed tree is shown with an associated table below for the corresponding missing data percentage(s) (rows) and gap-removal parameter(s) (columns: C- conservative, L- liberal, R- remgaps). † - Rhodospirillales paraphyletic. Totals for branch order are in the box at bottom right. \* - bootstrap support for that node < 51%. Ana- Anaplasmataceae, Rick- Rickettsiaceae, Rhodosp- Rhodospirillales, Sph- Sphingomonadales, CHP- Caulobacterales, Hyphomonadaceae, Parvularculales, Rhod- Rhodobacteraceae.

Table S1. Bacterial taxa used in the analyses represented in Figs. 1a, 4, S1

| NCBI<br>taxon ID       | Complete | Strain                                  | Family              | Order           | Class               | Protein<br>coding | G+C<br>% |
|------------------------|----------|-----------------------------------------|---------------------|-----------------|---------------------|-------------------|----------|
| <a href="#">573065</a> | no       | Asticcacaulis excentricus CB 48         | Caulobacteraceae    | Caulobacterales | Alphaproteobacteria | 3842              | 59.52    |
| <a href="#">190650</a> | yes      | Caulobacter crescentus CB15             | Caulobacteraceae    | Caulobacterales | Alphaproteobacteria | 3737              | 67.21    |
| <a href="#">565050</a> | yes      | Caulobacter crescentus NA1000           | Caulobacteraceae    | Caulobacterales | Alphaproteobacteria | 3876              | 67.17    |
| <a href="#">366602</a> | yes      | Caulobacter sp. K31                     | Caulobacteraceae    | Caulobacterales | Alphaproteobacteria | 5443              | 67.35    |
| <a href="#">450851</a> | yes      | Phenylobacterium zucineum HLK1          | Caulobacteraceae    | Caulobacterales | Alphaproteobacteria | 3854              | 71.1     |
| <a href="#">314260</a> | no       | Parvularcula bermudensis HTCC2503       | Parvularculaceae    | Parvularculales | Alphaproteobacteria | 2733              | 60.66    |
| <a href="#">314269</a> | no       | Aurantimonas sp. SI85-9A1               | Aurantimonadaceae   | Rhizobiales     | Alphaproteobacteria | 3650              | 66.74    |
| <a href="#">314231</a> | no       | Fulvimarina pelagi HTCC2506             | Aurantimonadaceae   | Rhizobiales     | Alphaproteobacteria | 3754              | 61.23    |
| <a href="#">360095</a> | yes      | Bartonella bacilliformis KC583          | Bartonellaceae      | Rhizobiales     | Alphaproteobacteria | 1322              | 38.24    |
| <a href="#">634504</a> | yes      | Bartonella grahamii as4aup              | Bartonellaceae      | Rhizobiales     | Alphaproteobacteria | 1768              | 38.04    |
| <a href="#">283166</a> | yes      | Bartonella henselae Houston-1           | Bartonellaceae      | Rhizobiales     | Alphaproteobacteria | 1611              | 38.23    |
| <a href="#">283165</a> | yes      | Bartonella quintana Toulouse            | Bartonellaceae      | Rhizobiales     | Alphaproteobacteria | 1306              | 38.8     |
| <a href="#">382640</a> | yes      | Bartonella tribocorum CIP 105476        | Bartonellaceae      | Rhizobiales     | Alphaproteobacteria | 2121              | 38.82    |
| <a href="#">395963</a> | yes      | Beijerinckia indica indica ATCC 9039    | Beijerinckiaceae    | Rhizobiales     | Alphaproteobacteria | 3788              | 59.68    |
| <a href="#">395965</a> | yes      | Methylocella silvestris BL2             | Beijerinckiaceae    | Rhizobiales     | Alphaproteobacteria | 3917              | 63.08    |
| <a href="#">224911</a> | yes      | Bradyrhizobium japonicum USDA 110       | Bradyrhizobiaceae   | Rhizobiales     | Alphaproteobacteria | 8317              | 64.06    |
| <a href="#">288000</a> | yes      | Bradyrhizobium sp. BTAi1                | Bradyrhizobiaceae   | Rhizobiales     | Alphaproteobacteria | 7741              | 64.81    |
| <a href="#">323097</a> | yes      | Nitrobacter hamburgensis X14            | Bradyrhizobiaceae   | Rhizobiales     | Alphaproteobacteria | 4673              | 61.62    |
| <a href="#">323098</a> | yes      | Nitrobacter winogradskyi Nb-255         | Bradyrhizobiaceae   | Rhizobiales     | Alphaproteobacteria | 3143              | 62.05    |
| <a href="#">504832</a> | yes      | Oligotropha carboxidovorans OM5         | Bradyrhizobiaceae   | Rhizobiales     | Alphaproteobacteria | 3722              | 62.4     |
| <a href="#">395960</a> | yes      | Rhodopseudomonas palustris TIE-1        | Bradyrhizobiaceae   | Rhizobiales     | Alphaproteobacteria | 5318              | 64.86    |
| <a href="#">430066</a> | yes      | Brucella abortus S19                    | Bruceaceae          | Rhizobiales     | Alphaproteobacteria | 3000              | 57.22    |
| <a href="#">483179</a> | yes      | Brucella canis ATCC 23365               | Bruceaceae          | Rhizobiales     | Alphaproteobacteria | 3335              | 57.24    |
| <a href="#">546272</a> | yes      | Brucella melitensis ATCC 23457          | Bruceaceae          | Rhizobiales     | Alphaproteobacteria | 3136              | 57.22    |
| <a href="#">568815</a> | yes      | Brucella microti CCM 4915               | Bruceaceae          | Rhizobiales     | Alphaproteobacteria | 3282              | 57.25    |
| <a href="#">444178</a> | yes      | Brucella ovis ATCC 25840                | Bruceaceae          | Rhizobiales     | Alphaproteobacteria | 3112              | 57.19    |
| <a href="#">470137</a> | yes      | Brucella suis ATCC 23445                | Bruceaceae          | Rhizobiales     | Alphaproteobacteria | 3346              | 57.21    |
| <a href="#">439375</a> | yes      | Ochrobactrum anthropi ATCC 49188        | Bruceaceae          | Rhizobiales     | Alphaproteobacteria | 4856              | 56.13    |
| <a href="#">641118</a> | no       | Ochrobactrum intermedium LMG 3301       | Bruceaceae          | Rhizobiales     | Alphaproteobacteria | 4363              | 57.74    |
| <a href="#">582899</a> | no       | Hyphomicrobium denitrificans ATCC 51888 | Hyphomicrobiaceae   | Rhizobiales     | Alphaproteobacteria | 3495              | 60.84    |
| <a href="#">440085</a> | yes      | Methylobacterium chloromethanicum       | Methylobacteriaceae | Rhizobiales     | Alphaproteobacteria | 5771              | 68.08    |

| CM4                    |     |                                              |                     |                 |                     |      |       |
|------------------------|-----|----------------------------------------------|---------------------|-----------------|---------------------|------|-------|
| <a href="#">272630</a> | yes | Methylobacterium extorquens AM1              | Methylobacteriaceae | Rhizobiales     | Alphaproteobacteria | 6216 | 68.48 |
| <a href="#">460265</a> | yes | Methylobacterium nodulans ORS 2060           | Methylobacteriaceae | Rhizobiales     | Alphaproteobacteria | 8791 | 68.44 |
| <a href="#">441620</a> | yes | Methylobacterium populi BJ001                | Methylobacteriaceae | Rhizobiales     | Alphaproteobacteria | 5464 | 69.36 |
| <a href="#">426355</a> | yes | Methylobacterium radiotolerans JCM 2831      | Methylobacteriaceae | Rhizobiales     | Alphaproteobacteria | 6431 | 71.04 |
| <a href="#">411684</a> | no  | Hoeflea phototrophica DFL-43                 | Phyllobacteriaceae  | Rhizobiales     | Alphaproteobacteria | 4357 | 59.81 |
| <a href="#">266835</a> | yes | Mesorhizobium loti MAFF303099                | Phyllobacteriaceae  | Rhizobiales     | Alphaproteobacteria | 7272 | 62.51 |
| <a href="#">402881</a> | yes | Parvibaculum lavamentivorans DS-1            | Phyllobacteriaceae  | Rhizobiales     | Alphaproteobacteria | 3654 | 62.33 |
| <a href="#">311403</a> | yes | Agrobacterium radiobacter K84                | Rhizobiaceae        | Rhizobiales     | Alphaproteobacteria | 6684 | 59.87 |
| <a href="#">176299</a> | yes | Agrobacterium tumefaciens C58 (Cereon)       | Rhizobiaceae        | Rhizobiales     | Alphaproteobacteria | 5288 | 59.04 |
| <a href="#">311402</a> | yes | Agrobacterium vitis S4                       | Rhizobiaceae        | Rhizobiales     | Alphaproteobacteria | 5389 | 57.47 |
| <a href="#">537021</a> | yes | Candidatus Liberibacter asiaticus str. psy62 | Rhizobiaceae        | Rhizobiales     | Alphaproteobacteria | 1109 | 36.48 |
| <a href="#">347834</a> | yes | Rhizobium etli CFN 42                        | Rhizobiaceae        | Rhizobiales     | Alphaproteobacteria | 6030 | 61.03 |
| <a href="#">395492</a> | yes | Rhizobium leguminosarum bv. trifolii WSM2304 | Rhizobiaceae        | Rhizobiales     | Alphaproteobacteria | 6581 | 61.18 |
| <a href="#">366394</a> | yes | Sinorhizobium medicae WSM419                 | Rhizobiaceae        | Rhizobiales     | Alphaproteobacteria | 6518 | 61.15 |
| <a href="#">266834</a> | yes | Sinorhizobium meliloti 1021                  | Rhizobiaceae        | Rhizobiales     | Alphaproteobacteria | 6212 | 62.17 |
| <a href="#">438753</a> | yes | Azorhizobium caulinodans ORS 571             | Xanthobacteraceae   | Rhizobiales     | Alphaproteobacteria | 4717 | 67.32 |
| <a href="#">78245</a>  | yes | Xanthobacter autotrophicus Py2               | Xanthobacteraceae   | Rhizobiales     | Alphaproteobacteria | 5095 | 67.35 |
| <a href="#">582402</a> | yes | Hirschia baltica ATCC 49814                  | Hyphomonadaceae     | Rhodobacterales | Alphaproteobacteria | 3222 | 45.19 |
| <a href="#">228405</a> | yes | Hyphomonas neptunium ATCC 15444              | Hyphomonadaceae     | Rhodobacterales | Alphaproteobacteria | 3520 | 61.93 |
| <a href="#">394221</a> | yes | Maricaulis maris MCS10                       | Hyphomonadaceae     | Rhodobacterales | Alphaproteobacteria | 3079 | 62.73 |
| <a href="#">314254</a> | no  | Oceanicaulis alexandrii HTCC2633             | Hyphomonadaceae     | Rhodobacterales | Alphaproteobacteria | 3029 | 63.59 |
| <a href="#">398580</a> | yes | Dinoroseobacter shibae DFL 12                | Rhodobacteraceae    | Rhodobacterales | Alphaproteobacteria | 4219 | 65.52 |
| <a href="#">290400</a> | yes | Jannaschia sp. CCS1                          | Rhodobacteraceae    | Rhodobacterales | Alphaproteobacteria | 4283 | 62.24 |
| <a href="#">314232</a> | no  | Loktanella vestfoldensis SKA53               | Rhodobacteraceae    | Rhodobacterales | Alphaproteobacteria | 3068 | 59.96 |
| <a href="#">391624</a> | no  | Oceanibulbus indolifex HEL-45                | Rhodobacteraceae    | Rhodobacterales | Alphaproteobacteria | 4153 | 59.52 |
| <a href="#">252305</a> | no  | Oceanicola batsensis HTCC2597                | Rhodobacteraceae    | Rhodobacterales | Alphaproteobacteria | 4212 | 66.1  |
| <a href="#">314256</a> | no  | Oceanicola granulosus HTCC2516               | Rhodobacteraceae    | Rhodobacterales | Alphaproteobacteria | 3792 | 70.41 |
| <a href="#">318586</a> | yes | Paracoccus denitrificans PD1222              | Rhodobacteraceae    | Rhodobacterales | Alphaproteobacteria | 5077 | 66.7  |
| <a href="#">383629</a> | no  | Phaeobacter gallaeciensis 2.10               | Rhodobacteraceae    | Rhodobacterales | Alphaproteobacteria | 3948 | 59.78 |
| <a href="#">391619</a> | no  | Phaeobacter gallaeciensis BS107              | Rhodobacteraceae    | Rhodobacterales | Alphaproteobacteria | 4059 | 59.81 |
| <a href="#">349102</a> | yes | Rhodobacter sphaeroides ATCC 17025           | Rhodobacteraceae    | Rhodobacterales | Alphaproteobacteria | 4397 | 68.23 |
| <a href="#">388401</a> | no  | Rhodobacterales bacterium HTCC2150           | Rhodobacteraceae    | Rhodobacterales | Alphaproteobacteria | 3667 | 49.05 |
| <a href="#">314271</a> | no  | Rhodobacterales bacterium HTCC2654           | Rhodobacteraceae    | Rhodobacterales | Alphaproteobacteria | 4712 | 64.13 |

|                        |     |                                              |                   |                  |                     |      |       |
|------------------------|-----|----------------------------------------------|-------------------|------------------|---------------------|------|-------|
| <a href="#">373154</a> | no  | Rhodobacterales sp. HTCC2255                 | Rhodobacteraceae  | Rhodobacterales  | Alphaproteobacteria | 4507 | 38.9  |
| <a href="#">375451</a> | yes | Roseobacter denitrificans OCH 114            | Rhodobacteraceae  | Rhodobacterales  | Alphaproteobacteria | 4146 | 58.88 |
| <a href="#">391595</a> | no  | Roseobacter litoralis Och 149                | Rhodobacteraceae  | Rhodobacterales  | Alphaproteobacteria | 4746 | 57.25 |
| <a href="#">89187</a>  | no  | Roseovarius nubinhibens ISM                  | Rhodobacteraceae  | Rhodobacterales  | Alphaproteobacteria | 3547 | 63.91 |
| <a href="#">314265</a> | no  | Roseovarius sp. HTCC2601                     | Rhodobacteraceae  | Rhodobacterales  | Alphaproteobacteria | 5452 | 66.44 |
| <a href="#">391613</a> | no  | Roseovarius sp. TM1035                       | Rhodobacteraceae  | Rhodobacterales  | Alphaproteobacteria | 4102 | 60.98 |
| <a href="#">388399</a> | no  | Sagittula stellata E-37                      | Rhodobacteraceae  | Rhodobacterales  | Alphaproteobacteria | 5067 | 65.05 |
| <a href="#">246200</a> | yes | Silicibacter pomeroyi DSS-3                  | Rhodobacteraceae  | Rhodobacterales  | Alphaproteobacteria | 4283 | 64.07 |
| <a href="#">292414</a> | yes | Silicibacter sp. TM1040                      | Rhodobacteraceae  | Rhodobacterales  | Alphaproteobacteria | 3870 | 60.06 |
| <a href="#">384765</a> | no  | Stappia aggregata IAM 12614                  | Rhodobacteraceae  | Rhodobacterales  | Alphaproteobacteria | 6314 | 59.38 |
| <a href="#">52598</a>  | no  | Sulfitobacter sp. EE-36                      | Rhodobacteraceae  | Rhodobacterales  | Alphaproteobacteria | 3474 | 60.31 |
| <a href="#">314267</a> | no  | Sulfitobacter sp. NAS-14.1                   | Rhodobacteraceae  | Rhodobacterales  | Alphaproteobacteria | 3962 | 60.05 |
| <a href="#">634452</a> | yes | Acetobacter pasteurianus IFO 3283-01         | Acetobacteraceae  | Rhodospirillales | Alphaproteobacteria | 3050 | 53.1  |
| <a href="#">349163</a> | yes | Acidiphilium cryptum JF-5                    | Acetobacteraceae  | Rhodospirillales | Alphaproteobacteria | 3637 | 67.1  |
| <a href="#">272568</a> | yes | Gluconacetobacter diazotrophicus PAI 5       | Acetobacteraceae  | Rhodospirillales | Alphaproteobacteria | 3566 | 66.32 |
| <a href="#">290633</a> | yes | Gluconobacter oxydans 621H                   | Acetobacteraceae  | Rhodospirillales | Alphaproteobacteria | 2664 | 60.82 |
| <a href="#">391165</a> | yes | Granulobacter bethesdensis CGDNIH1           | Acetobacteraceae  | Rhodospirillales | Alphaproteobacteria | 2437 | 59.07 |
|                        | yes | Candidatus Puniceispirillum marinum IMCC1322 | Rhodospirillaceae | Rhodospirillales | Alphaproteobacteria | 2546 | 48.85 |
| <a href="#">342108</a> | yes | Magnetospirillum magneticum AMB-1            | Rhodospirillaceae | Rhodospirillales | Alphaproteobacteria | 4559 | 65.09 |
| <a href="#">331869</a> | no  | Nisaea sp. BAL199                            | Rhodospirillaceae | Rhodospirillales | Alphaproteobacteria | 6128 | 65.02 |
| <a href="#">414684</a> | yes | Rhodospirillum centenum SW                   | Rhodospirillaceae | Rhodospirillales | Alphaproteobacteria | 4002 | 70.46 |
| <a href="#">269796</a> | yes | Rhodospirillum rubrum ATCC 11170             | Rhodospirillaceae | Rhodospirillales | Alphaproteobacteria | 3850 | 65.38 |
| <a href="#">320483</a> | yes | Anaplasma marginale Florida                  | Anaplasmataceae   | Rickettsiales    | Alphaproteobacteria | 940  | 49.77 |
| <a href="#">234826</a> | yes | Anaplasma marginale St. Maries               | Anaplasmataceae   | Rickettsiales    | Alphaproteobacteria | 963  | 49.76 |
| <a href="#">212042</a> | yes | Anaplasma phagocytophilum HZ                 | Anaplasmataceae   | Rickettsiales    | Alphaproteobacteria | 1291 | 41.64 |
| <a href="#">269484</a> | yes | Ehrlichia canis Jake                         | Anaplasmataceae   | Rickettsiales    | Alphaproteobacteria | 942  | 28.96 |
| <a href="#">332415</a> | no  | Ehrlichia chaffeensis Sapulpa                | Anaplasmataceae   | Rickettsiales    | Alphaproteobacteria | 805  | 29.98 |
| <a href="#">302409</a> | yes | Ehrlichia ruminantium Gardel                 | Anaplasmataceae   | Rickettsiales    | Alphaproteobacteria | 950  | 27.41 |
| <a href="#">434131</a> | yes | Neorickettsia risticii str. Illinois         | Anaplasmataceae   | Rickettsiales    | Alphaproteobacteria | 892  | 41.27 |
| <a href="#">222891</a> | yes | Neorickettsia sennetsu Miyayama              | Anaplasmataceae   | Rickettsiales    | Alphaproteobacteria | 935  | 41.08 |
| <a href="#">314261</a> | yes | HTCC1062                                     | Pelagibacteraceae | Rickettsiales    | Alphaproteobacteria | 1393 | 29.76 |
| <a href="#">335992</a> | yes | HTCC1002                                     | Pelagibacteraceae | Rickettsiales    | Alphaproteobacteria | 1354 | 29.68 |
| 439493                 | yes | HTCC7211                                     | Pelagibacteraceae | Rickettsiales    | Alphaproteobacteria | 1541 | 29.03 |
| 198252                 | no  | HTCC9565                                     | Pelagibacteraceae | Rickettsiales    | Alphaproteobacteria | 1352 | 28.93 |
| 684719                 | no  | HIMB114                                      | Pelagibacteraceae | Rickettsiales    | Alphaproteobacteria | 1321 | 29.59 |

|                        |     |                                                      |                    |                    |                     |      |       |
|------------------------|-----|------------------------------------------------------|--------------------|--------------------|---------------------|------|-------|
| 28211                  | no  | HIMB5                                                | Pelagibacteraceae  | Rickettsiales      | Alphaproteobacteria | 1431 | 28.63 |
| 744985                 | no  | HIMB59                                               |                    |                    | Alphaproteobacteria | 1393 | 32.26 |
| <a href="#">357244</a> | yes | Orientia tsutsugamushi Boryong                       | Rickettsiaceae     | Rickettsiales      | Alphaproteobacteria | 2141 | 30.53 |
| <a href="#">334380</a> | yes | Orientia tsutsugamushi Ikeda                         | Rickettsiaceae     | Rickettsiales      | Alphaproteobacteria | 1967 | 30.51 |
| <a href="#">347255</a> | yes | Rickettsia africae ESF-5                             | Rickettsiaceae     | Rickettsiales      | Alphaproteobacteria | 1041 | 32.41 |
| <a href="#">293614</a> | yes | Rickettsia akari Hartford                            | Rickettsiaceae     | Rickettsiales      | Alphaproteobacteria | 1259 | 32.33 |
| <a href="#">391896</a> | yes | Rickettsia bellii OSU 85-389                         | Rickettsiaceae     | Rickettsiales      | Alphaproteobacteria | 1476 | 31.63 |
| <a href="#">293613</a> | yes | Rickettsia canadensis McKiel                         | Rickettsiaceae     | Rickettsiales      | Alphaproteobacteria | 1093 | 31.05 |
| <a href="#">272944</a> | yes | Rickettsia conorii Malish 7                          | Rickettsiaceae     | Rickettsiales      | Alphaproteobacteria | 1376 | 32.44 |
| <a href="#">315456</a> | yes | Rickettsia felis URRWXCa2                            | Rickettsiaceae     | Rickettsiales      | Alphaproteobacteria | 1512 | 32.51 |
| <a href="#">416276</a> | yes | Rickettsia massiliae MTU5                            | Rickettsiaceae     | Rickettsiales      | Alphaproteobacteria | 1396 | 32.53 |
| <a href="#">562019</a> | yes | Rickettsia peacockii str. Rustic                     | Rickettsiaceae     | Rickettsiales      | Alphaproteobacteria | 947  | 32.6  |
| <a href="#">272947</a> | yes | Rickettsia prowazekii Madrid E                       | Rickettsiaceae     | Rickettsiales      | Alphaproteobacteria | 835  | 29    |
| <a href="#">392021</a> | yes | Rickettsia rickettsii Sheila Smith                   | Rickettsiaceae     | Rickettsiales      | Alphaproteobacteria | 1345 | 32.47 |
| <a href="#">272951</a> | no  | Rickettsia sibirica 246                              | Rickettsiaceae     | Rickettsiales      | Alphaproteobacteria | 1234 | 32.47 |
| <a href="#">257363</a> | yes | Rickettsia typhi Wilmington                          | Rickettsiaceae     | Rickettsiales      | Alphaproteobacteria | 880  | 28.92 |
| <a href="#">569881</a> | no  | Wolbachia endosymbiont of Culex quinquefasciatus JHB | Rickettsiaceae     | Rickettsiales      | Alphaproteobacteria | 1378 | 34.19 |
| <a href="#">163164</a> | yes | Wolbachia endosymbiont of Drosophila melanogaster    | Rickettsiaceae     | Rickettsiales      | Alphaproteobacteria | 1268 | 35.23 |
| <a href="#">292805</a> | yes | Wolbachia endosymbiont TRS of Brugia malayi          | Rickettsiaceae     | Rickettsiales      | Alphaproteobacteria | 900  | 34.18 |
| <a href="#">955</a>    | yes | Wolbachia pipientis wPip                             | Rickettsiaceae     | Rickettsiales      | Alphaproteobacteria | 1275 | 34.19 |
| <a href="#">66084</a>  | yes | Wolbachia sp. wRi                                    | Rickettsiaceae     | Rickettsiales      | Alphaproteobacteria | 1150 | 35.16 |
| <a href="#">314225</a> | yes | Erythrobacter litoralis HTCC2594                     | Erythrobacteraceae | Sphingomonadales   | Alphaproteobacteria | 3011 | 63.07 |
| <a href="#">237727</a> | no  | Erythrobacter sp. NAP1                               | Erythrobacteraceae | Sphingomonadales   | Alphaproteobacteria | 3177 | 60.97 |
| <a href="#">279238</a> | yes | Novosphingobium aromaticivorans DSM 12444            | Sphingomonadaceae  | Sphingomonadales   | Alphaproteobacteria | 3957 | 65.11 |
| <a href="#">314266</a> | no  | Sphingomonas sp. SKA58                               | Sphingomonadaceae  | Sphingomonadales   | Alphaproteobacteria | 3914 | 63.19 |
| <a href="#">392499</a> | yes | Sphingomonas wittichii RW1                           | Sphingomonadaceae  | Sphingomonadales   | Alphaproteobacteria | 5399 | 67.9  |
| <a href="#">317655</a> | yes | Sphingopyxis alaskensis RB2256                       | Sphingomonadaceae  | Sphingomonadales   | Alphaproteobacteria | 3208 | 65.46 |
| <a href="#">264203</a> | yes | Zymomonas mobilis mobilis ZM4                        | Sphingomonadaceae  | Sphingomonadales   | Alphaproteobacteria | 1998 | 46.33 |
|                        |     | outgroup                                             |                    |                    |                     |      |       |
| <a href="#">243231</a> | yes | Geobacter sulfurreducens PCA                         | Geobacteraceae     | Desulfuromonadales | Deltaproteobacteria | 3465 | 60.94 |
| <a href="#">316385</a> | yes | Escherichia coli K12 DH10B                           | Enterobacteriaceae | Enterobacterales   | Gammaproteobacteria | 4126 | 50.78 |

|                        |     |                                                  |                        |                    |                     |      |       |     |
|------------------------|-----|--------------------------------------------------|------------------------|--------------------|---------------------|------|-------|-----|
| <a href="#">243365</a> | yes | Chromobacterium violaceum ATCC 12472             | Neisseriaceae          | Neisseriales       | Betaproteobacteria  | 4407 | 64.83 |     |
| <a href="#">272843</a> | yes | Pasteurella multocida multocida Pm70             | Pasteurellaceae        | Pasteurellales     | Gammaproteobacteria | 2015 | 40.4  |     |
| <a href="#">196600</a> | yes | Vibrio vulnificus YJ016                          | Vibrionaceae           | Vibrionales        | Gammaproteobacteria | 5024 | 46.68 |     |
| <a href="#">267608</a> | yes | Ralstonia solanacearum GMI1000                   | Burkholderiaceae       | Burkholderiales    | Betaproteobacteria  | 5120 | 66.98 |     |
|                        |     |                                                  |                        |                    |                     |      | 55.1  | avg |
|                        |     | low GC outgroup                                  |                        |                    |                     |      |       |     |
| 641147                 | no  | Simonsiella muelleri ATCC 29453                  | Neisseriaceae          | Neisseriales       | Betaproteobacteria  | 2416 | 41.33 |     |
| 583345                 | yes | Methylotenera mobilis JLW8                       | Methylophilaceae       | Methylophilales    | Betaproteobacteria  | 2348 | 45.51 |     |
| <a href="#">272843</a> | yes | Pasteurella multocida multocida Pm70             | Pasteurellaceae        | Pasteurellales     | Gammaproteobacteria | 2015 | 40.4  |     |
| 233412                 | yes | Haemophilus ducreyi 35000HP                      | Pasteurellaceae        | Pasteurellales     | Gammaproteobacteria | 1762 | 38.22 |     |
| 412965                 | yes | Candidatus Vesicomysocius okutanii HA            |                        |                    | Gammaproteobacteria | 939  | 31.59 |     |
| 363253                 | yes | Lawsonia intracellularis PHE/MN1-00              | Desulfovibrionaceae    | Desulfovibrionales | Deltaproteobacteria | 1344 | 33.08 |     |
|                        |     |                                                  |                        |                    |                     |      | 38.4  | avg |
|                        |     | high GC outgroup                                 |                        |                    |                     |      |       |     |
| <a href="#">290397</a> | yes | Anaeromyxobacter dehalogenans 2CP-C              | Myxococcaceae          | Myxococcales       | Deltaproteobacteria | 4361 | 74.91 |     |
| <a href="#">243365</a> | yes | Chromobacterium violaceum ATCC 12472             | Neisseriaceae          | Neisseriales       | Betaproteobacteria  | 4407 | 64.83 |     |
| <a href="#">267608</a> | yes | Ralstonia solanacearum GMI1000                   | Burkholderiaceae       | Burkholderiales    | Betaproteobacteria  | 5120 | 66.98 |     |
| 208964                 | yes | Pseudomonas aeruginosa PAO1                      | Pseudomonadaceae       | Pseudomonadales    | Gammaproteobacteria | 5568 | 66.56 |     |
| 190485                 | yes | Xanthomonas campestris pv. campestris ATCC 33913 | Xanthomonadaceae       | Xanthomonadales    | Gammaproteobacteria | 4181 | 65.07 |     |
| 349124                 | yes | Halorhodospira halophila SL1                     | Ectothiorhodospiraceae | Chromatiales       | Gammaproteobacteria | 2407 | 67.98 |     |
|                        |     |                                                  |                        |                    |                     |      | 67.7  | avg |

Table S2. Bacterial taxa used in the analyses represented in Figs. 1b, 2, 5

| NCBI taxon ID          | Complete | Strain                                      | Family            | Order         | Class               | Protein coding | G+C % |
|------------------------|----------|---------------------------------------------|-------------------|---------------|---------------------|----------------|-------|
| <a href="#">320483</a> | yes      | Anaplasma marginale Florida                 | Anaplasmataceae   | Rickettsiales | Alphaproteobacteria | 940            | 49.77 |
| <a href="#">234826</a> | yes      | Anaplasma marginale St. Maries              | Anaplasmataceae   | Rickettsiales | Alphaproteobacteria | 963            | 49.76 |
| <a href="#">517436</a> | no       | Anaplasma marginale str. Mississippi        | Anaplasmataceae   | Rickettsiales | Alphaproteobacteria | 885            | 49.79 |
| <a href="#">517437</a> | no       | Anaplasma marginale str. Puerto Rico        | Anaplasmataceae   | Rickettsiales | Alphaproteobacteria | 965            | 49.8  |
| <a href="#">403779</a> | no       | Anaplasma marginale str. Virginia           | Anaplasmataceae   | Rickettsiales | Alphaproteobacteria | 961            | 49.79 |
| <a href="#">212042</a> | yes      | Anaplasma phagocytophilum HZ                | Anaplasmataceae   | Rickettsiales | Alphaproteobacteria | 1291           | 41.64 |
| <a href="#">269484</a> | yes      | Ehrlichia canis Jake                        | Anaplasmataceae   | Rickettsiales | Alphaproteobacteria | 942            | 28.96 |
| <a href="#">205920</a> | yes      | Ehrlichia chaffeensis Arkansas              | Anaplasmataceae   | Rickettsiales | Alphaproteobacteria | 1114           | 30.1  |
| <a href="#">332415</a> | no       | Ehrlichia chaffeensis Sapulpa               | Anaplasmataceae   | Rickettsiales | Alphaproteobacteria | 805            | 29.98 |
| <a href="#">302409</a> | yes      | Ehrlichia ruminantium Gardel                | Anaplasmataceae   | Rickettsiales | Alphaproteobacteria | 950            | 27.41 |
| <a href="#">254945</a> | yes      | Ehrlichia ruminantium Welgevonden (ARC-OVI) | Anaplasmataceae   | Rickettsiales | Alphaproteobacteria | 920            | 27.48 |
| <a href="#">254945</a> | yes      | Ehrlichia ruminantium Welgevonden (CIRAD)   | Anaplasmataceae   | Rickettsiales | Alphaproteobacteria | 958            | 27.48 |
| <a href="#">434131</a> | yes      | Neorickettsia risticii str. Illinois        | Anaplasmataceae   | Rickettsiales | Alphaproteobacteria | 892            | 41.27 |
| <a href="#">222891</a> | yes      | Neorickettsia sennetsu Miyayama             | Anaplasmataceae   | Rickettsiales | Alphaproteobacteria | 935            | 41.08 |
| <a href="#">314261</a> | yes      | HTCC1062                                    | Pelagibacteraceae | Rickettsiales | Alphaproteobacteria | 1393           | 29.76 |
| <a href="#">335992</a> | yes      | HTCC1002                                    | Pelagibacteraceae | Rickettsiales | Alphaproteobacteria | 1354           | 29.68 |
| <a href="#">439493</a> | yes      | HTCC7211                                    | Pelagibacteraceae | Rickettsiales | Alphaproteobacteria | 1541           | 29.03 |
| <a href="#">198252</a> | no       | HTCC9565                                    | Pelagibacteraceae | Rickettsiales | Alphaproteobacteria | 1352           | 28.93 |
| <a href="#">684719</a> | no       | HIMB114                                     | Pelagibacteraceae | Rickettsiales | Alphaproteobacteria | 1321           | 29.59 |
| <a href="#">28211</a>  | no       | HIMB5                                       | Pelagibacteraceae | Rickettsiales | Alphaproteobacteria | 1431           | 28.63 |
| <a href="#">744985</a> | no       | HIMB59                                      |                   |               | Alphaproteobacteria | 1393           | 32.26 |
| <a href="#">357244</a> | yes      | Orientia tsutsugamushi Boryong              | Rickettsiaceae    | Rickettsiales | Alphaproteobacteria | 2141           | 30.53 |
| <a href="#">334380</a> | yes      | Orientia tsutsugamushi Ikeda                | Rickettsiaceae    | Rickettsiales | Alphaproteobacteria | 1967           | 30.51 |
| <a href="#">347255</a> | yes      | Rickettsia africae ESF-5                    | Rickettsiaceae    | Rickettsiales | Alphaproteobacteria | 1041           | 32.41 |
| <a href="#">293614</a> | yes      | Rickettsia akari Hartford                   | Rickettsiaceae    | Rickettsiales | Alphaproteobacteria | 1259           | 32.33 |
| <a href="#">391896</a> | yes      | Rickettsia bellii OSU 85-389                | Rickettsiaceae    | Rickettsiales | Alphaproteobacteria | 1476           | 31.63 |
| <a href="#">336407</a> | yes      | Rickettsia bellii RML369-C                  | Rickettsiaceae    | Rickettsiales | Alphaproteobacteria | 1429           | 31.65 |
| <a href="#">293613</a> | yes      | Rickettsia canadensis McKiel                | Rickettsiaceae    | Rickettsiales | Alphaproteobacteria | 1093           | 31.05 |
| <a href="#">272944</a> | yes      | Rickettsia conorii Malish 7                 | Rickettsiaceae    | Rickettsiales | Alphaproteobacteria | 1376           | 32.44 |
| <a href="#">315456</a> | yes      | Rickettsia felis URRWXCal2                  | Rickettsiaceae    | Rickettsiales | Alphaproteobacteria | 1512           | 32.51 |

|                        |     |                                                                    |                    |                  |                     |      |       |
|------------------------|-----|--------------------------------------------------------------------|--------------------|------------------|---------------------|------|-------|
| <a href="#">416276</a> | yes | <i>Rickettsia massiliae</i> MTU5                                   | Rickettsiaceae     | Rickettsiales    | Alphaproteobacteria | 1396 | 32.53 |
| <a href="#">562019</a> | yes | <i>Rickettsia peacockii</i> str. Rustic                            | Rickettsiaceae     | Rickettsiales    | Alphaproteobacteria | 947  | 32.6  |
| <a href="#">272947</a> | yes | <i>Rickettsia prowazekii</i> Madrid E                              | Rickettsiaceae     | Rickettsiales    | Alphaproteobacteria | 835  | 29    |
| <a href="#">452659</a> | yes | <i>Rickettsia rickettsii</i> Iowa                                  | Rickettsiaceae     | Rickettsiales    | Alphaproteobacteria | 1384 | 32.45 |
| <a href="#">392021</a> | yes | <i>Rickettsia rickettsii</i> Sheila Smith                          | Rickettsiaceae     | Rickettsiales    | Alphaproteobacteria | 1345 | 32.47 |
| <a href="#">272951</a> | no  | <i>Rickettsia sibirica</i> 246                                     | Rickettsiaceae     | Rickettsiales    | Alphaproteobacteria | 1234 | 32.47 |
| <a href="#">257363</a> | yes | <i>Rickettsia typhi</i> Wilmington                                 | Rickettsiaceae     | Rickettsiales    | Alphaproteobacteria | 880  | 28.92 |
| <a href="#">292805</a> | yes | <i>Wolbachia endosymbiont</i> TRS of <i>Brugia malayi</i>          | Rickettsiaceae     | Rickettsiales    | Alphaproteobacteria | 900  | 34.18 |
| <a href="#">569881</a> | no  | <i>Wolbachia endosymbiont</i> of <i>Culex quinquefasciatus</i> JHB | Rickettsiaceae     | Rickettsiales    | Alphaproteobacteria | 1378 | 34.19 |
| <a href="#">307502</a> | no  | <i>Wolbachia endosymbiont</i> of <i>Drosophila ananassae</i>       | Rickettsiaceae     | Rickettsiales    | Alphaproteobacteria | 1802 | 35.71 |
| <a href="#">163164</a> | yes | <i>Wolbachia endosymbiont</i> of <i>Drosophila melanogaster</i>    | Rickettsiaceae     | Rickettsiales    | Alphaproteobacteria | 1268 | 35.23 |
| <a href="#">77038</a>  | no  | <i>Wolbachia endosymbiont</i> of <i>Drosophila simulans</i>        | Rickettsiaceae     | Rickettsiales    | Alphaproteobacteria | 760  | 35.4  |
| <a href="#">955</a>    | yes | <i>Wolbachia pipientis</i> wPip                                    | Rickettsiaceae     | Rickettsiales    | Alphaproteobacteria | 1275 | 34.19 |
| <a href="#">66084</a>  | yes | <i>Wolbachia</i> sp. wRi                                           | Rickettsiaceae     | Rickettsiales    | Alphaproteobacteria | 1150 | 35.16 |
| <a href="#">634452</a> | yes | <i>Acetobacter pasteurianus</i> IFO 3283-01                        | Acetobacteraceae   | Rhodospirillales | Alphaproteobacteria | 3050 | 53.1  |
| <a href="#">349163</a> | yes | <i>Acidiphilium cryptum</i> JF-5                                   | Acetobacteraceae   | Rhodospirillales | Alphaproteobacteria | 3637 | 67.1  |
| <a href="#">272568</a> | yes | <i>Gluconacetobacter diazotrophicus</i> PAI 5                      | Acetobacteraceae   | Rhodospirillales | Alphaproteobacteria | 3566 | 66.32 |
| <a href="#">290633</a> | yes | <i>Gluconobacter oxydans</i> 621H                                  | Acetobacteraceae   | Rhodospirillales | Alphaproteobacteria | 2664 | 60.82 |
| <a href="#">391165</a> | yes | <i>Granulobacter bethesdensis</i> CGDNIH1                          | Acetobacteraceae   | Rhodospirillales | Alphaproteobacteria | 2437 | 59.07 |
| <a href="#">342108</a> | yes | <i>Magnetospirillum magneticum</i> AMB-1                           | Rhodospirillaceae  | Rhodospirillales | Alphaproteobacteria | 4559 | 65.09 |
| <a href="#">331869</a> | no  | <i>Nisaea</i> sp. BAL199                                           | Rhodospirillaceae  | Rhodospirillales | Alphaproteobacteria | 6128 | 65.02 |
| <a href="#">414684</a> | yes | <i>Rhodospirillum centenum</i> SW                                  | Rhodospirillaceae  | Rhodospirillales | Alphaproteobacteria | 4002 | 70.46 |
| <a href="#">269796</a> | yes | <i>Rhodospirillum rubrum</i> ATCC 11170                            | Rhodospirillaceae  | Rhodospirillales | Alphaproteobacteria | 3850 | 65.38 |
| <a href="#">314225</a> | yes | <i>Erythrobacter litoralis</i> HTCC2594                            | Erythrobacteraceae | Sphingomonadales | Alphaproteobacteria | 3011 | 63.07 |
| <a href="#">237727</a> | no  | <i>Erythrobacter</i> sp. NAP1                                      | Erythrobacteraceae | Sphingomonadales | Alphaproteobacteria | 3177 | 60.97 |
| <a href="#">161528</a> | no  | <i>Erythrobacter</i> sp. SD-21                                     | Erythrobacteraceae | Sphingomonadales | Alphaproteobacteria | 2941 | 62.86 |
| <a href="#">279238</a> | yes | <i>Novosphingobium aromaticivorans</i> DSM 12444                   | Sphingomonadaceae  | Sphingomonadales | Alphaproteobacteria | 3957 | 65.11 |
| <a href="#">314266</a> | no  | <i>Sphingomonas</i> sp. SKA58                                      | Sphingomonadaceae  | Sphingomonadales | Alphaproteobacteria | 3914 | 63.19 |
| <a href="#">392499</a> | yes | <i>Sphingomonas wittichii</i> RW1                                  | Sphingomonadaceae  | Sphingomonadales | Alphaproteobacteria | 5399 | 67.9  |
| <a href="#">317655</a> | yes | <i>Sphingopyxis alaskensis</i> RB2256                              | Sphingomonadaceae  | Sphingomonadales | Alphaproteobacteria | 3208 | 65.46 |
| <a href="#">264203</a> | yes | <i>Zymomonas mobilis mobilis</i> ZM4                               | Sphingomonadaceae  | Sphingomonadales | Alphaproteobacteria | 1998 | 46.33 |



|                        |     |                                             |                   |                  |                     |      |       |
|------------------------|-----|---------------------------------------------|-------------------|------------------|---------------------|------|-------|
| <a href="#">555217</a> | no  | Zymomonas mobilis subsp. mobilis ATCC 10988 | Sphingomonadaceae | Sphingomonadales | Alphaproteobacteria | 1845 | 46.1  |
| <a href="#">573065</a> | no  | Asticcacaulis excentricus CB 48             | Caulobacteraceae  | Caulobacterales  | Alphaproteobacteria | 3842 | 59.52 |
| <a href="#">190650</a> | yes | Caulobacter crescentus CB15                 | Caulobacteraceae  | Caulobacterales  | Alphaproteobacteria | 3737 | 67.21 |
| <a href="#">565050</a> | yes | Caulobacter crescentus NA1000               | Caulobacteraceae  | Caulobacterales  | Alphaproteobacteria | 3876 | 67.17 |
| <a href="#">366602</a> | yes | Caulobacter sp. K31                         | Caulobacteraceae  | Caulobacterales  | Alphaproteobacteria | 5443 | 67.35 |
| <a href="#">450851</a> | yes | Phenylobacterium zucineum HLK1              | Caulobacteraceae  | Caulobacterales  | Alphaproteobacteria | 3854 | 71.1  |
| <a href="#">314260</a> | no  | Parvularcula bermudensis HTCC2503           | Parvularculaceae  | Parvularculales  | Alphaproteobacteria | 2733 | 60.66 |
| <a href="#">582402</a> | yes | Hirschia baltica ATCC 49814                 | Hyphomonadaceae   | Rhodobacterales  | Alphaproteobacteria | 3222 | 45.19 |
| <a href="#">228405</a> | yes | Hyphomonas neptunium ATCC 15444             | Hyphomonadaceae   | Rhodobacterales  | Alphaproteobacteria | 3520 | 61.93 |
| <a href="#">394221</a> | yes | Maricaulis maris MCS10                      | Hyphomonadaceae   | Rhodobacterales  | Alphaproteobacteria | 3079 | 62.73 |
| <a href="#">314254</a> | no  | Oceanicaulis alexandrii HTCC2633            | Hyphomonadaceae   | Rhodobacterales  | Alphaproteobacteria | 3029 | 63.59 |
| <a href="#">388401</a> | no  | Rhodobacterales bacterium HTCC2150          | Rhodobacteraceae  | Rhodobacterales  | Alphaproteobacteria | 3667 | 49.05 |
| <a href="#">314271</a> | no  | Rhodobacterales bacterium HTCC2654          | Rhodobacteraceae  | Rhodobacterales  | Alphaproteobacteria | 4712 | 64.13 |
| <a href="#">398580</a> | yes | Dinoroseobacter shibae DFL 12               | Rhodobacteraceae  | Rhodobacterales  | Alphaproteobacteria | 4219 | 65.52 |
| <a href="#">290400</a> | yes | Jannaschia sp. CCS1                         | Rhodobacteraceae  | Rhodobacterales  | Alphaproteobacteria | 4283 | 62.24 |
| <a href="#">314232</a> | no  | Loktanella vestfoldensis SKA53              | Rhodobacteraceae  | Rhodobacterales  | Alphaproteobacteria | 3068 | 59.96 |
| <a href="#">391624</a> | no  | Oceanibulbus indolifex HEL-45               | Rhodobacteraceae  | Rhodobacterales  | Alphaproteobacteria | 4153 | 59.52 |
| <a href="#">252305</a> | no  | Oceanicola batsensis HTCC2597               | Rhodobacteraceae  | Rhodobacterales  | Alphaproteobacteria | 4212 | 66.1  |
| <a href="#">314256</a> | no  | Oceanicola granulosus HTCC2516              | Rhodobacteraceae  | Rhodobacterales  | Alphaproteobacteria | 3792 | 70.41 |
| <a href="#">318586</a> | yes | Paracoccus denitrificans PD1222             | Rhodobacteraceae  | Rhodobacterales  | Alphaproteobacteria | 5077 | 66.7  |
| <a href="#">383629</a> | no  | Phaeobacter gallaeciensis 2.10              | Rhodobacteraceae  | Rhodobacterales  | Alphaproteobacteria | 3948 | 59.78 |
| <a href="#">391619</a> | no  | Phaeobacter gallaeciensis BS107             | Rhodobacteraceae  | Rhodobacterales  | Alphaproteobacteria | 4059 | 59.81 |
| <a href="#">272943</a> | yes | Rhodobacter sphaeroides 2.4.1               | Rhodobacteraceae  | Rhodobacterales  | Alphaproteobacteria | 4304 | 68.79 |
| <a href="#">349102</a> | yes | Rhodobacter sphaeroides ATCC 17025          | Rhodobacteraceae  | Rhodobacterales  | Alphaproteobacteria | 4397 | 68.23 |
| <a href="#">349101</a> | yes | Rhodobacter sphaeroides ATCC 17029          | Rhodobacteraceae  | Rhodobacterales  | Alphaproteobacteria | 4183 | 68.98 |
| <a href="#">557760</a> | yes | Rhodobacter sphaeroides KD131               | Rhodobacteraceae  | Rhodobacterales  | Alphaproteobacteria | 4569 | 69.09 |
| <a href="#">375451</a> | yes | Roseobacter denitrificans OCh 114           | Rhodobacteraceae  | Rhodobacterales  | Alphaproteobacteria | 4146 | 58.88 |
| <a href="#">391595</a> | no  | Roseobacter litoralis Och 149               | Rhodobacteraceae  | Rhodobacterales  | Alphaproteobacteria | 4746 | 57.25 |
| <a href="#">351016</a> | no  | Roseobacter sp. AzwK-3b                     | Rhodobacteraceae  | Rhodobacterales  | Alphaproteobacteria | 4145 | 61.85 |
| <a href="#">391593</a> | no  | Roseobacter sp. CCS2                        | Rhodobacteraceae  | Rhodobacterales  | Alphaproteobacteria | 3660 | 55.47 |
| <a href="#">314262</a> | no  | Roseobacter sp. MED193                      | Rhodobacteraceae  | Rhodobacterales  | Alphaproteobacteria | 4535 | 57.45 |
| <a href="#">388739</a> | no  | Roseobacter sp. SK209-2-6                   | Rhodobacteraceae  | Rhodobacterales  | Alphaproteobacteria | 4537 | 57.02 |
| <a href="#">89187</a>  | no  | Roseovarius nubinhibens ISM                 | Rhodobacteraceae  | Rhodobacterales  | Alphaproteobacteria | 3547 | 63.91 |
| <a href="#">314264</a> | no  | Roseovarius sp. 217                         | Rhodobacteraceae  | Rhodobacterales  | Alphaproteobacteria | 4772 | 60.81 |
| <a href="#">314265</a> | no  | Roseovarius sp. HTCC2601                    | Rhodobacteraceae  | Rhodobacterales  | Alphaproteobacteria | 5452 | 66.44 |

|                        |     |                                      |                        |                 |                     |      |       |     |
|------------------------|-----|--------------------------------------|------------------------|-----------------|---------------------|------|-------|-----|
| <a href="#">391613</a> | no  | Roseovarius sp. TM1035               | Rhodobacteraceae       | Rhodobacterales | Alphaproteobacteria | 4102 | 60.98 |     |
| <a href="#">388399</a> | no  | Sagittula stellata E-37              | Rhodobacteraceae       | Rhodobacterales | Alphaproteobacteria | 5067 | 65.05 |     |
| <a href="#">246200</a> | yes | Silicibacter pomeroyi DSS-3          | Rhodobacteraceae       | Rhodobacterales | Alphaproteobacteria | 4283 | 64.07 |     |
| <a href="#">292414</a> | yes | Silicibacter sp. TM1040              | Rhodobacteraceae       | Rhodobacterales | Alphaproteobacteria | 3870 | 60.06 |     |
| <a href="#">384765</a> | no  | Stappia aggregata IAM 12614          | Rhodobacteraceae       | Rhodobacterales | Alphaproteobacteria | 6314 | 59.38 |     |
| <a href="#">52598</a>  | no  | Sulfitobacter sp. EE-36              | Rhodobacteraceae       | Rhodobacterales | Alphaproteobacteria | 3474 | 60.31 |     |
| <a href="#">314267</a> | no  | Sulfitobacter sp. NAS-14.1           | Rhodobacteraceae       | Rhodobacterales | Alphaproteobacteria | 3962 | 60.05 |     |
| <a href="#">373154</a> | no  | Rhodobacterales sp. HTCC2255         | Rhodobacteraceae       | Rhodobacterales | Alphaproteobacteria | 4507 | 38.9  |     |
|                        |     | outgroup                             |                        |                 |                     |      |       |     |
| <a href="#">243365</a> | yes | Chromobacterium violaceum ATCC 12472 | Neisseriaceae          | Neisseriales    | Betaproteobacteria  | 4407 | 64.83 |     |
| <a href="#">272843</a> | yes | Pasteurella multocida multocida Pm70 | Pasteurellaceae        | Pasteurellales  | Gammaproteobacteria | 2015 | 40.4  |     |
|                        |     |                                      |                        |                 |                     |      | 52.6  | avg |
|                        |     | low GC outgroup                      |                        |                 |                     |      |       |     |
| 641147                 | no  | Simonsiella muelleri ATCC 29453      | Neisseriaceae          | Neisseriales    | Betaproteobacteria  | 2416 | 41.33 |     |
| <a href="#">272843</a> | yes | Pasteurella multocida multocida Pm70 | Pasteurellaceae        | Pasteurellales  | Gammaproteobacteria | 2015 | 40.4  |     |
|                        |     |                                      |                        |                 |                     |      | 40.9  | avg |
|                        |     | high GC outgroup                     |                        |                 |                     |      |       |     |
| <a href="#">243365</a> | yes | Chromobacterium violaceum ATCC 12472 | Neisseriaceae          | Neisseriales    | Betaproteobacteria  | 4407 | 64.83 |     |
| 349124                 | yes | Halorhodospira halophila SL1         | Ectothiorhodospiraceae | Chromatiales    | Gammaproteobacteria | 2407 | 67.98 |     |
|                        |     |                                      |                        |                 |                     |      | 66.4  | avg |

Table S3. Mitochondrial taxa used in the study

a

| accession | organism                                  | clade           | Super Group    | length | protein-coding | G+C % |
|-----------|-------------------------------------------|-----------------|----------------|--------|----------------|-------|
| AY359242  | <i>Pseudendoclonium akinetum</i>          | Chlorophyta     | Archaeplastida | 95880  | 72             | 39.34 |
| CR954200  | <i>Ostreococcus tauri</i>                 | Chlorophyta     | Archaeplastida | 44237  | 43             | 38.23 |
| AF110138  | <i>Nephroselmis olivacea</i>              | Chlorophyta     | Archaeplastida | 45223  | 40             | 32.81 |
| AP006444  | <i>Brassica napus</i>                     | Embryophyta     | Archaeplastida | 221853 | 79             | 45.19 |
| M68929    | <i>Marchantia polymorpha</i>              | Embryophyta     | Archaeplastida | 186609 | 76             | 42.41 |
| EF463011  | <i>Chlorokybus atmophyticus</i>           | Embryophyta     | Archaeplastida | 201763 | 58             | 39.8  |
| AF494279  | <i>Chaetosphaeridium globosum</i>         | Embryophyta     | Archaeplastida | 56574  | 46             | 34.41 |
| AY267353  | <i>Chara vulgaris</i>                     | Embryophyta     | Archaeplastida | 67737  | 46             | 40.9  |
| AF353999  | <i>Mesostigma viride</i>                  | Embryophyta     | Archaeplastida | 42424  | 41             | 32.22 |
| D89861    | <i>Cyanidioschyzon merolae strain 10D</i> | Rhodophyta      | Archaeplastida | 32211  | 34             | 27.07 |
| AF114794  | <i>Porphyra purpurea</i>                  | Rhodophyta      | Archaeplastida | 36753  | 31             | 33.49 |
| EU651892  | <i>Hemiselmis andersenii</i>              | Cryptophyta     | Chromalveolata | 60553  | 44             | 28.73 |
| AF288090  | <i>Rhodomonas salina</i>                  | Cryptophyta     | Chromalveolata | 48063  | 44             | 29.83 |
| AJ277126  | <i>Pylaiella littoralis</i>               | Stramenopiles   | Chromalveolata | 58507  | 52             | 37.99 |
| DQ832717  | <i>Phytophthora sojae</i>                 | Stramenopiles   | Chromalveolata | 42977  | 47             | 21.7  |
| AF288092  | <i>Naegleria gruberi</i>                  | Heterolobosea   | Excavata       | 49843  | 46             | 22.25 |
| AF007261  | <i>Reclinomonas americana</i>             | Jakobida        | Excavata       | 69034  | 67             | 26.13 |
| AF295546  | <i>Malawimonas jakobiformis</i>           | Malawimonadidae | Excavata       | 47328  | 49             | 26.12 |

b

| accession | organism                         | clade       | Super Group    | length | protein-coding | G+C % |
|-----------|----------------------------------|-------------|----------------|--------|----------------|-------|
| AY359242  | <i>Pseudendoclonium akinetum</i> | Chlorophyta | Archaeplastida | 95880  | 72             | 39.34 |
| CR954200  | <i>Ostreococcus tauri</i>        | Chlorophyta | Archaeplastida | 44237  | 43             | 38.23 |
| AF110138  | <i>Nephroselmis olivacea</i>     | Chlorophyta | Archaeplastida | 45223  | 40             | 32.81 |
| FJ859351  | <i>Micromonas sp. RCC299</i>     | Chlorophyta | Archaeplastida | 47425  | 39             | 34    |
| DQ365900  | <i>Oltmannsiellopsis viridis</i> | Chlorophyta | Archaeplastida | 56761  | 36             | 33    |
| U02970    | <i>Prototheca wickerhamii</i>    | Chlorophyta | Archaeplastida | 55328  | 36             | 25    |
| AY506529  | <i>Zea mays</i>                  | Embryophyta | Archaeplastida | 569630 | 163            | 43    |
| BA000042  | <i>Nicotiana tabacum</i>         | Embryophyta | Archaeplastida | 430597 | 156            | 44    |

|          |                                        |               |                |        |     |       |
|----------|----------------------------------------|---------------|----------------|--------|-----|-------|
| BA000009 | Beta vulgaris                          | Embryophyta   | Archaeplastida | 368801 | 140 | 43    |
| Y08501   | Arabidopsis thaliana                   | Embryophyta   | Archaeplastida | 366924 | 117 | 44    |
| AP006444 | Brassica napus                         | Embryophyta   | Archaeplastida | 221853 | 79  | 45.19 |
| M68929   | Marchantia polymorpha                  | Embryophyta   | Archaeplastida | 186609 | 76  | 42.41 |
| FM179380 | Vitis vinifera                         | Embryophyta   | Archaeplastida | 773279 | 74  | 44    |
| FJ999996 | Pleurozia purpurea                     | Embryophyta   | Archaeplastida | 168526 | 69  | 45    |
| EF463011 | Chlorokybus atmophyticus               | Embryophyta   | Archaeplastida | 201763 | 58  | 39.8  |
| BA000029 | Oryza sativa (japonica cultivar-group) | Embryophyta   | Archaeplastida | 490520 | 53  | 43    |
| EU660574 | Megaceros aenigmaticus                 | Embryophyta   | Archaeplastida | 184908 | 48  | 46    |
| AF494279 | Chaetosphaeridium globosum             | Embryophyta   | Archaeplastida | 56574  | 46  | 34.41 |
| AY267353 | Chara vulgaris                         | Embryophyta   | Archaeplastida | 67737  | 46  | 40.9  |
| AB251495 | Physcomitrella patens                  | Embryophyta   | Archaeplastida | 105340 | 42  | 40    |
| AF353999 | Mesostigma viride                      | Embryophyta   | Archaeplastida | 42424  | 41  | 32.22 |
| AP011076 | Oryza rufipogon                        | Embryophyta   | Archaeplastida | 559045 | 41  | 44    |
| EU431224 | Carica papaya                          | Embryophyta   | Archaeplastida | 476890 | 39  | 45    |
| GQ856147 | Citrullus lanatus                      | Embryophyta   | Archaeplastida | 379236 | 39  | 45    |
| AP008982 | Triticum aestivum                      | Embryophyta   | Archaeplastida | 452528 | 39  | 44    |
| D89861   | Cyanidioschyzon merolae strain 10D     | Rhodophyta    | Archaeplastida | 32211  | 34  | 27.07 |
| AF114794 | Porphyra purpurea                      | Rhodophyta    | Archaeplastida | 36753  | 31  | 33.49 |
| Z47547   | Chondrus crispus                       | Rhodophyta    | Archaeplastida | 25836  | 29  | 27    |
| X15917   | Paramecium aurelia                     | Alveolata     | Chromalveolata | 40469  | 46  | 41    |
| DQ927303 | Tetrahymena malaccensis                | Alveolata     | Chromalveolata | 47691  | 45  | 19    |
| AF396436 | Tetrahymena thermophila                | Alveolata     | Chromalveolata | 47577  | 45  | 20    |
| DQ927304 | Tetrahymena paravorax                  | Alveolata     | Chromalveolata | 47496  | 44  | 18    |
| DQ927305 | Tetrahymena pigmentosa                 | Alveolata     | Chromalveolata | 46990  | 44  | 18    |
| AF160864 | Tetrahymena pyriformis                 | Alveolata     | Chromalveolata | 47296  | 44  | 21    |
| EU651892 | Hemiselmis andersenii                  | Cryptophyta   | Chromalveolata | 60553  | 44  | 28.73 |
| AF288090 | Rhodomonas salina                      | Cryptophyta   | Chromalveolata | 48063  | 44  | 29.83 |
| AJ277126 | Pylaiella littoralis                   | Stramenopiles | Chromalveolata | 58507  | 52  | 37.99 |
| DQ832717 | Phytophthora sojae                     | Stramenopiles | Chromalveolata | 42977  | 47  | 21    |
| AF287134 | Ochromonas danica                      | Stramenopiles | Chromalveolata | 41035  | 44  | 26    |
| DQ832718 | Phytophthora ramorum                   | Stramenopiles | Chromalveolata | 39314  | 43  | 21.7  |
| AY534144 | Saprolegnia ferax                      | Stramenopiles | Chromalveolata | 46930  | 43  | 23    |
| AB546636 | Chattonella marina                     | Stramenopiles | Chromalveolata | 44772  | 41  | 28    |
| U17009   | Phytophthora infestans                 | Stramenopiles | Chromalveolata | 37957  | 40  | 22    |
| AY500367 | Desmarestia viridis                    | Stramenopiles | Chromalveolata | 39049  | 39  | 36    |

|          |                          |                 |                |       |    |       |
|----------|--------------------------|-----------------|----------------|-------|----|-------|
| AJ344328 | Laminaria digitata       | Stramenopiles   | Chromalveolata | 38007 | 39 | 35    |
| AF288092 | Naegleria gruberi        | Heterolobosea   | Excavata       | 49843 | 46 | 22.25 |
| AF007261 | Reclinomonas americana   | Jakobida        | Excavata       | 69034 | 67 | 26.13 |
| AF295546 | Malawimonas jakobiformis | Malawimonadidae | Excavata       | 47328 | 49 | 26.12 |

Table S4. Mitochondrial OCs used in Figs. 3, 7

|            |                                                                                                             |
|------------|-------------------------------------------------------------------------------------------------------------|
| Bn_007jUWG | gi 112253866 ref YP_717122.1  ribosomal protein S7 [Brassica napus]                                         |
| Bn_00V5ePU | gi 112253916 ref YP_717170.1  ribosomal protein S14 [Brassica napus]                                        |
| Bn_025PoQH | gi 112253893 ref YP_717148.1  cytochrome c biogenesis ccmB [Brassica napus]                                 |
| Bn_0173Zt4 | gi 112253922 ref YP_717175.1  ribosomal protein S4 [Brassica napus]                                         |
| Bn_00PhgdH | gi 112253903 ref YP_717158.1  hypothetical protein BrnapMp061 [Brassica napus]                              |
| Bn_01wlDwc | gi 112253902 ref YP_717157.1  ribosomal protein L2 [Brassica napus]                                         |
| Bn_02rGfAv | gi 112253889 ref YP_717144.1  ATPase subunit 9 [Brassica napus]                                             |
| Bn_01pvmuC | gi 112253892 ref YP_717147.1  ribosomal protein S12 [Brassica napus]                                        |
| Ca_02f6Hav | gi 150406489 ref YP_001315105.1  ribosomal protein S7 [Chlorokybus atmophyticus]                            |
| Ca_04c1Q64 | gi 150406484 ref YP_001315133.1  ribosomal protein S14 [Chlorokybus atmophyticus]                           |
| Ca_03CKkmb | gi 150406481 ref YP_001315102.1  ribosomal protein S11 [Chlorokybus atmophyticus]                           |
| Ca_02wFhA6 | gi 150406491 ref YP_001315099.1  succinate:cytochrome c oxidoreductase subunit 3 [Chlorokybus atmophyticus] |
| Ca_02XXFwo | gi 150406492 ref YP_001315098.1  succinate:cytochrome c oxidoreductase subunit 4 [Chlorokybus atmophyticus] |
| Ca_01kFW5g | gi 150406488 ref YP_001315127.1  ribosomal protein S4 [Chlorokybus atmophyticus]                            |
| Ca_01zj566 | gi 150406465 ref YP_001315126.1  SecY-independent transporter protein [Chlorokybus atmophyticus]            |
| Ca_04dUtdp | gi 150406477 ref YP_001315121.1  ribosomal protein L2 [Chlorokybus atmophyticus]                            |
| Ca_03sDHm5 | gi 150406483 ref YP_001315132.1  ribosomal protein S13 [Chlorokybus atmophyticus]                           |
| Ca_01FHhQb | gi 150406460 ref YP_001315109.1  ATP synthase F0 subunit 9 [Chlorokybus atmophyticus]                       |
| Ca_00Gp4uT | gi 150406482 ref YP_001315103.1  ribosomal protein S12 [Chlorokybus atmophyticus]                           |
| Ca_0164TvG | gi 150406485 ref YP_001315122.1  ribosomal protein S19 [Chlorokybus atmophyticus]                           |
| Cg_00An5iK | gi 22550362 ref NP_689373.1  ribosomal protein S7 [Chaetosphaeridium globosum]                              |
| Cg_00QhCva | gi 22550357 ref NP_689358.1  ribosomal protein S14 [Chaetosphaeridium globosum]                             |
| Cg_00fmY6J | gi 22550354 ref NP_689355.1  ribosomal protein S11 [Chaetosphaeridium globosum]                             |
| Cg_03n6g9y | gi 22550363 ref NP_689350.1  succinate:cytochrome c oxidoreductase subunit 3 [Chaetosphaeridium globosum]   |
| Cg_04KtkKh | gi 22550364 ref NP_689351.1  succinate:cytochrome c oxidoreductase subunit 4 [Chaetosphaeridium globosum]   |
| Cg_03akIMF | gi 22550361 ref NP_689354.1  ribosomal protein S4 [Chaetosphaeridium globosum]                              |
| Cg_00ZKtTH | gi 22550365 ref NP_689353.1  SecY-independent transporter protein [Chaetosphaeridium globosum]              |
| Cg_00VF0Cq | gi 22550349 ref NP_689363.1  ribosomal protein L2 [Chaetosphaeridium globosum]                              |
| Cg_049ivfM | gi 22550356 ref NP_689356.1  ribosomal protein S13 [Chaetosphaeridium globosum]                             |
| Cg_02BiB6m | gi 22550334 ref NP_689389.1  ATP synthase F0 subunit 9 [Chaetosphaeridium globosum]                         |
| Cg_04lg0gF | gi 22550355 ref NP_689372.1  ribosomal protein S12 [Chaetosphaeridium globosum]                             |

Cg\_00Lfy6A gi|22550358|ref|NP\_689362.1| ribosomal protein S19 [Chaetosphaeridium globosum]

Cm\_03V1xZK gi|8954382|ref|NP\_059371.1| 30S ribosomal protein S14 [Cyanidioschyzon merolae]  
Cm\_00YGOWO gi|8954380|ref|NP\_059369.1| 30S ribosomal protein S11 [Cyanidioschyzon merolae]  
Cm\_03pPHq8 gi|8954360|ref|NP\_059349.1| succinate dehydrogenase cytochrome B560 subunit [Cyanidioschyzon merolae]  
Cm\_01vbZ3q gi|8954387|ref|NP\_059376.1| ORF267 [Cyanidioschyzon merolae]  
Cm\_00YcRFH gi|8954376|ref|NP\_059366.1| cytochrome c1 ABC transporter ATP-binding subunit [Cyanidioschyzon merolae]  
Cm\_04d4g9U gi|8954388|ref|NP\_059377.1| ATP synthase F0 subunit 9 [Cyanidioschyzon merolae]  
Cm\_018tqtS gi|8954390|ref|NP\_059379.1| ribosomal protein S12 [Cyanidioschyzon merolae]

Cv\_01ktvfr gi|38638301|ref|NP\_943687.1| ribosomal protein S7 [Chara vulgaris]  
Cv\_04a4M5p gi|38638296|ref|NP\_943670.1| ribosomal protein S14 [Chara vulgaris]  
Cv\_02m78na gi|38638294|ref|NP\_943668.1| ribosomal protein S11 [Chara vulgaris]  
Cv\_00rTACc gi|38638302|ref|NP\_943707.1| succinate:cytochrome c oxidoreductase subunit 3 [Chara vulgaris]  
Cv\_00k2VO6 gi|38638303|ref|NP\_943706.1| succinate:cytochrome c oxidoreductase subunit 4 [Chara vulgaris]  
Cv\_01L94bF gi|38638309|ref|NP\_943698.1| channel subunit of ABC transporter for cytochrome c1 [Chara vulgaris]  
Cv\_00NWYQj gi|38638300|ref|NP\_943664.1| ribosomal protein S4 [Chara vulgaris]  
Cv\_04cy8Bx gi|38638306|ref|NP\_943665.1| SecY-independent transporter protein [Chara vulgaris]  
Cv\_02Zhzcl gi|38638289|ref|NP\_943676.1| ribosomal protein L2 [Chara vulgaris]  
Cv\_02TrYhk gi|38638274|ref|NP\_943666.1| ATP synthase F0 subunit 9 [Chara vulgaris]  
Cv\_04WDNVb gi|38638295|ref|NP\_943688.1| ribosomal protein S12 [Chara vulgaris]  
Cv\_02fKMMF gi|38638297|ref|NP\_943675.1| ribosomal protein S19 [Chara vulgaris]

Ha\_01WJ79G gi|186920139|ref|YP\_001874793.1| ribosomal protein S7 [Hemiselms andersenii]  
Ha\_02iAJP0 gi|186920145|ref|YP\_001874799.1| ribosomal protein S14 [Hemiselms andersenii]  
Ha\_04f9Z6k gi|186920120|ref|YP\_001874774.1| ribosomal protein S11 [Hemiselms andersenii]  
Ha\_01vk2Ut gi|186920110|ref|YP\_001874764.1| succinate:cytochrome c oxidoreductase subunit 4 [Hemiselms andersenii]  
Ha\_00CFqt2 gi|186920146|ref|YP\_001874800.1| hypothetical protein HAM\_072 [Hemiselms andersenii]  
Ha\_0290Flw gi|186920132|ref|YP\_001874786.1| ribosomal protein S4 [Hemiselms andersenii]  
Ha\_02dfNsA gi|186920134|ref|YP\_001874788.1| sec-independent protein translocase protein TatC [Hemiselms andersenii]  
Ha\_00q2P9p gi|186920119|ref|YP\_001874773.1| ribosomal protein S13 [Hemiselms andersenii]  
Ha\_02Byllf gi|186920133|ref|YP\_001874787.1| ATP synthase F0 subunit 9 [Hemiselms andersenii]  
Ha\_02CHcKn gi|186920138|ref|YP\_001874792.1| ribosomal protein S12 [Hemiselms andersenii]  
Ha\_02NiSBb gi|186920140|ref|YP\_001874794.1| ribosomal protein S19 [Hemiselms andersenii]

Mj\_03lxX1Q gi|11466644|ref|NP\_066327.1| ribosomal protein S7 [Malawimonas jakobiformis]

|            |                                                                                                           |
|------------|-----------------------------------------------------------------------------------------------------------|
| Mj_01HVjda | gi 11466631 ref NP_066314.1  ribosomal protein S14 [Malawimonas jakobiformis]                             |
| Mj_04IgdI6 | gi 11466638 ref NP_066321.1  ribosomal protein S11 [Malawimonas jakobiformis]                             |
| Mj_019vYL0 | gi 11466639 ref NP_066322.1  ribosomal protein S4 [Malawimonas jakobiformis]                              |
| Mj_04KtGIQ | gi 11466636 ref NP_066319.1  ribosomal protein L20 [Malawimonas jakobiformis]                             |
| Mj_01ezVUC | gi 11466665 ref NP_066348.1  SecY-independent transporter protein [Malawimonas jakobiformis]              |
| Mj_02P7IGE | gi 11466652 ref NP_066335.1  ribosomal protein L2 [Malawimonas jakobiformis]                              |
| Mj_022V2CQ | gi 11466637 ref NP_066320.1  ribosomal protein S13 [Malawimonas jakobiformis]                             |
| Mj_01iMQYf | gi 11466660 ref NP_066343.1  ATP synthase F0 subunit 9 [Malawimonas jakobiformis]                         |
| Mj_03BCjDE | gi 11466627 ref NP_066310.1  ribosomal protein L11 [Malawimonas jakobiformis]                             |
| Mj_01T4vbO | gi 39656299 ref NP_945313.1  ribosomal protein L36 [Malawimonas jakobiformis]                             |
| Mj_03vgtSK | gi 11466647 ref NP_066330.1  ribosomal protein S12 [Malawimonas jakobiformis]                             |
| Mj_02K7noH | gi 11466659 ref NP_066342.1  ribosomal protein S19 [Malawimonas jakobiformis]                             |
|            |                                                                                                           |
| Mp_01kXiPU | gi 11467105 ref NP_054406.1  ribosomal protein S7 [Marchantia polymorpha]                                 |
| Mp_01bdy2G | gi 11467122 ref NP_054423.1  ribosomal protein S14 [Marchantia polymorpha]                                |
| Mp_00KriuB | gi 11467126 ref NP_054427.1  ribosomal protein S11 [Marchantia polymorpha]                                |
| Mp_01OfIEg | gi 11467108 ref NP_054409.1  succinate dehydrogenase subunit 3 [Marchantia polymorpha]                    |
| Mp_04KEg8O | gi 11467130 ref NP_054431.1  succinate dehydrogenase subunit 4 [Marchantia polymorpha]                    |
| Mp_01PE7mN | gi 11467164 ref NP_054465.1  ABC transporter channel subunit [Marchantia polymorpha]                      |
| Mp_00bbFw9 | gi 11467160 ref NP_054461.1  ribosomal protein S4 [Marchantia polymorpha]                                 |
| Mp_03SfSrD | gi 11467132 ref NP_054433.1  Sec-Y independent protein translocase component TatA [Marchantia polymorpha] |
| Mp_01qx8fV | gi 11467117 ref NP_054418.1  ribosomal protein L2 [Marchantia polymorpha]                                 |
| Mp_01mIDij | gi 11467125 ref NP_054426.1  ribosomal protein S13 [Marchantia polymorpha]                                |
| Mp_03xzYvj | gi 11467161 ref NP_054462.1  ATP synthase F0 subunit 9 [Marchantia polymorpha]                            |
| Mp_03sYYXB | gi 11467104 ref NP_054405.1  ribosomal protein S12 [Marchantia polymorpha]                                |
| Mp_02e6g0M | gi 11467118 ref NP_054419.1  ribosomal protein S19 [Marchantia polymorpha]                                |
|            |                                                                                                           |
| Mv_04HCy0C | gi 110225709 ref YP_665714.1  ribosomal protein S7 [Mesostigma viride]                                    |
| Mv_00PNDJf | gi 110225714 ref YP_665719.1  ribosomal protein S14 [Mesostigma viride]                                   |
| Mv_0182JaN | gi 110225717 ref YP_665722.1  ribosomal protein S11 [Mesostigma viride]                                   |
| Mv_00q9tgi | gi 110225706 ref YP_665711.1  succinate:cytochrome c oxidoreductase subunit 3 [Mesostigma viride]         |
| Mv_04Rk5Tp | gi 110225697 ref YP_665702.1  succinate:cytochrome c oxidoreductase subunit 4 [Mesostigma viride]         |
| Mv_03fX8t0 | gi 110225704 ref YP_665709.1  ribosomal protein S4 [Mesostigma viride]                                    |
| Mv_04YBfn8 | gi 110225690 ref YP_665695.1  SecY-independent transporter protein [Mesostigma viride]                    |
| Mv_024oUz9 | gi 110225694 ref YP_665699.1  ribosomal protein S13 [Mesostigma viride]                                   |
| Mv_00hXvin | gi 110225679 ref YP_665684.1  ATP synthase F0 subunit 9 [Mesostigma viride]                               |



|            |                                                                                 |
|------------|---------------------------------------------------------------------------------|
| Mv_02ZTI9P | gi 110225708 ref YP_665713.1  ribosomal protein S12 [Mesostigma viride]         |
| Mv_00R7fyT | gi 110225698 ref YP_665703.1  ribosomal protein S19 [Mesostigma viride]         |
| Ng_039eYQw | gi 11466203 ref NP_066526.1  ribosomal protein S14 [Naegleria gruberi]          |
| Ng_03K6reH | gi 11466197 ref NP_066520.1  ribosomal protein L2 [Naegleria gruberi]           |
| Ng_04TKZBo | gi 11466207 ref NP_066530.1  ribosomal protein S13 [Naegleria gruberi]          |
| Ng_01M3e8j | gi 11466219 ref NP_066542.1  ATP synthase F0 subunit 9 [Naegleria gruberi]      |
| Ng_00FOp6c | gi 11466196 ref NP_066519.1  ribosomal protein L11 [Naegleria gruberi]          |
| Ng_01EBXRx | gi 11466181 ref NP_066504.1  ribosomal protein S12 [Naegleria gruberi]          |
| Ng_01BE57k | gi 11466198 ref NP_066521.1  ribosomal protein S19 [Naegleria gruberi]          |
| No_03Tnlx  | gi 110225669 ref YP_665675.1  ribosomal protein S7 [Nephroselmis olivacea]      |
| No_00ygecl | gi 110225650 ref YP_665656.1  ribosomal protein S14 [Nephroselmis olivacea]     |
| No_00AXo9L | gi 110225646 ref YP_665652.1  ribosomal protein S11 [Nephroselmis olivacea]     |
| No_04JhIer | gi 110225639 ref YP_665646.1  ribosomal protein S4 [Nephroselmis olivacea]      |
| No_02T1oGT | gi 110225670 ref YP_665676.1  Ymf16 [Nephroselmis olivacea]                     |
| No_040liKg | gi 110225647 ref YP_665653.1  ribosomal protein S13 [Nephroselmis olivacea]     |
| No_00qg2q9 | gi 110225645 ref YP_665651.1  ATP synthase F0 subunit 9 [Nephroselmis olivacea] |
| No_04exJTX | gi 110225657 ref YP_665663.1  ribosomal protein S12 [Nephroselmis olivacea]     |
| No_00vPIBt | gi 110225655 ref YP_665661.1  ribosomal protein S19 [Nephroselmis olivacea]     |
| Ov_00IXn4T | gi 113170501 ref YP_717292.1  Rps7 [Ostreococcus tauri]                         |
| Ov_029m0mG | gi 113170481 ref YP_717272.1  Rps14 [Ostreococcus tauri]                        |
| Ov_043aZug | gi 113170477 ref YP_717268.1  Rps11 [Ostreococcus tauri]                        |
| Ov_04VBMNd | gi 113170474 ref YP_717265.1  Rps4 [Ostreococcus tauri]                         |
| Ov_04CIF96 | gi 113170475 ref YP_717266.1  Ymf16 [Ostreococcus tauri]                        |
| Ov_03DEM9o | gi 113170478 ref YP_717269.1  Rps13 [Ostreococcus tauri]                        |
| Ov_015fJDq | gi 113170476 ref YP_717267.1  Atp9 [Ostreococcus tauri]                         |
| Ov_04Nmj4U | gi 113170500 ref YP_717291.1  Rps12 [Ostreococcus tauri]                        |
| Ov_003iWgW | gi 113170486 ref YP_717277.1  Rps19 [Ostreococcus tauri]                        |
| Pa_04U75i5 | gi 49147157 ref YP_025759.1  ribosomal protein S14 [Pseudodoelium akinetum]     |
| Pa_04g0661 | gi 49147178 ref YP_025771.1  ribosomal protein S11 [Pseudodoelium akinetum]     |
| Pa_03CFq6o | gi 49147226 ref YP_025819.1  ribosomal protein S13 [Pseudodoelium akinetum]     |
| Pa_02BWjz8 | gi 49147211 ref YP_025804.1  ATP synthase F0 subunit 9 [Pseudodoelium akinetum] |
| Pa_03mluoT | gi 49147222 ref YP_025815.1  ribosomal protein S12 [Pseudodoelium akinetum]     |

Pa\_00Zpgbw gi|49147179|ref|YP\_025772.1| ribosomal protein S19 [Pseudendoclonium akinetum]

Pl\_02jnk00 gi|15150725|ref|NP\_150391.1| ribosomal protein S7 [Pylaiella littoralis]  
Pl\_02e3ZCB gi|15150751|ref|NP\_150417.1| ribosomal protein S14 [Pylaiella littoralis]  
Pl\_02JmKkp gi|15150735|ref|NP\_150401.1| ribosomal protein S11 [Pylaiella littoralis]  
Pl\_02ErAZg gi|15150718|ref|NP\_150384.1| ribosomal protein S4 [Pylaiella littoralis]  
Pl\_03pbHzE gi|15150720|ref|NP\_150386.1| SecY-independent protein translocase component tatC [Pylaiella littoralis]  
Pl\_03sawjQ gi|15150733|ref|NP\_150399.1| ribosomal protein L2 [Pylaiella littoralis]  
Pl\_03tgzry gi|15150734|ref|NP\_150400.1| ribosomal protein S13 [Pylaiella littoralis]  
Pl\_01qDC10 gi|15150714|ref|NP\_150380.1| ATP synthase F0 subunit c [Pylaiella littoralis]  
Pl\_042ra5U gi|15150724|ref|NP\_150390.1| ribosomal protein S12 [Pylaiella littoralis]  
Pl\_00opkvt gi|15150732|ref|NP\_150398.1| ribosomal protein S19 [Pylaiella littoralis]

Pp\_048lhJU gi|11465649|ref|NP\_049320.1| ribosomal protein S11 [Porphyra purpurea]  
Pp\_02S9vap gi|11465650|ref|NP\_049321.1| succinate:cytochrome c oxidoreductase subunit 3 [Porphyra purpurea]  
Pp\_02gsjd4 gi|11465634|ref|NP\_049305.1| succinate:cytochrome c oxidoreductase subunit 4 [Porphyra purpurea]  
Pp\_034ZvSe gi|11465646|ref|NP\_049317.1| SecY-independent transporter protein [Porphyra purpurea]  
Pp\_01NiK8B gi|11465630|ref|NP\_049301.1| ATP synthase F0 subunit 9 [Porphyra purpurea]  
Pp\_03hOMc3 gi|11465645|ref|NP\_049316.1| ribosomal protein S12 [Porphyra purpurea]

Ps\_01nLmqg gi|145932343|ref|YP\_001165391.1| ribosomal protein S7 [Phytophthora sojae]  
Ps\_04Akg5 gi|145932370|ref|YP\_001165419.1| ribosomal protein S14 [Phytophthora sojae]  
Ps\_04K2Ktr gi|145932362|ref|YP\_001165411.1| ribosomal protein S11 [Phytophthora sojae]  
Ps\_04JxNJO gi|145932374|ref|YP\_001165423.1| ribosomal protein S4 [Phytophthora sojae]  
Ps\_030c22f gi|145932360|ref|YP\_001165409.1| Sec-independent transporter protein [Phytophthora sojae]  
Ps\_02sLFHQ gi|145932364|ref|YP\_001165413.1| ribosomal protein L2 [Phytophthora sojae]  
Ps\_01BthCd gi|145932363|ref|YP\_001165412.1| ribosomal protein S13 [Phytophthora sojae]  
Ps\_046oWe5 gi|145932339|ref|YP\_001165387.1| ATP synthase F0 subunit 9 [Phytophthora sojae]  
Ps\_03uiQII gi|145932344|ref|YP\_001165392.1| ribosomal protein S12 [Phytophthora sojae]  
Ps\_00KJ0GQ gi|145932365|ref|YP\_001165414.1| ribosomal protein S19 [Phytophthora sojae]

Ra\_01dNkl3 gi|11466503|ref|NP\_044752.1| ribosomal protein S7 [Reclinomonas americana]  
Ra\_0172tNp gi|11466516|ref|NP\_044765.1| ribosomal protein S14 [Reclinomonas americana]  
Ra\_02r3fo7 gi|11466522|ref|NP\_044771.1| ribosomal protein S11 [Reclinomonas americana]  
Ra\_03ED77I gi|11466547|ref|NP\_044796.1| succinate:ubiquinone oxidoreductase subunit 3 [Reclinomonas americana]  
Ra\_00KhtbV gi|11466548|ref|NP\_044797.1| succinate:ubiquinone oxidoreductase subunit 4 [Reclinomonas americana]

|            |                                                                                                          |
|------------|----------------------------------------------------------------------------------------------------------|
| Ra_00CCuOp | gi 11466542 ref NP_044791.1  ABC transporter channel subunit [Reclinomonas americana]                    |
| Ra_03ixFpP | gi 11466526 ref NP_044775.1  ribosomal protein S4 [Reclinomonas americana]                               |
| Ra_043ZwUx | gi 11466537 ref NP_044786.1  ribosomal protein L20 [Reclinomonas americana]                              |
| Ra_00salxs | gi 11466520 ref NP_044769.1  SecY-type transporter protein [Reclinomonas americana]                      |
| Ra_04IWTQX | gi 11466529 ref NP_044778.1  Sec-independent protein translocase component TatC [Reclinomonas americana] |
| Ra_039BzL2 | gi 11466510 ref NP_044759.1  ribosomal protein L2 [Reclinomonas americana]                               |
| Ra_047zpfq | gi 11466521 ref NP_044770.1  ribosomal protein S13 [Reclinomonas americana]                              |
| Ra_04DsiQT | gi 11466543 ref NP_044792.1  ABC transporter ATP-binding subunit [Reclinomonas americana]                |
| Ra_01UFZwZ | gi 11466528 ref NP_044777.1  ATP synthase F0 subunit 9 [Reclinomonas americana]                          |
| Ra_01zzsJw | gi 11466497 ref NP_044746.1  ribosomal protein L11 [Reclinomonas americana]                              |
| Ra_00BaFnz | gi 11466498 ref NP_044747.1  ribosomal protein L1 [Reclinomonas americana]                               |
| Ra_023mnAd | gi 11466538 ref NP_044787.1  ribosomal protein L27 [Reclinomonas americana]                              |
| Ra_036TVB7 | gi 11466502 ref NP_044751.1  ribosomal protein S12 [Reclinomonas americana]                              |
| Ra_02FpcVP | gi 11466511 ref NP_044760.1  ribosomal protein S19 [Reclinomonas americana]                              |
|            |                                                                                                          |
| Rs_04D0CII | gi 11466599 ref NP_066489.1  ribosomal protein S7 [Rhodomonas salina]                                    |
| Rs_000Zlja | gi 11466572 ref NP_066462.1  ribosomal protein S14 [Rhodomonas salina]                                   |
| Rs_03R7M4I | gi 11466591 ref NP_066481.1  ribosomal protein S11 [Rhodomonas salina]                                   |
| Rs_00COm2F | gi 11466582 ref NP_066472.1  succinate:cytochrome c oxidoreductase subunit 3 [Rhodomonas salina]         |
| Rs_00M2ojj | gi 11466581 ref NP_066471.1  succinate:cytochrome c oxidoreductase subunit 4 [Rhodomonas salina]         |
| Rs_01SgCsj | gi 11466566 ref NP_066456.1  ribosomal protein S4 [Rhodomonas salina]                                    |
| Rs_03Z7oVD | gi 11466594 ref NP_066484.1  SecY-independent transporter protein [Rhodomonas salina]                    |
| Rs_02fsUwZ | gi 11466590 ref NP_066480.1  ribosomal protein S13 [Rhodomonas salina]                                   |
| Rs_00zJmnK | gi 11466567 ref NP_066457.1  ATP synthase F0 subunit 9 [Rhodomonas salina]                               |
| Rs_03RfOf9 | gi 11466598 ref NP_066488.1  ribosomal protein S12 [Rhodomonas salina]                                   |
| Rs_0188lae | gi 11466600 ref NP_066490.1  ribosomal protein S19 [Rhodomonas salina]                                   |
